# Supplementary material for: Non-Surgical Management of the Gingival Smile with Botulinum Toxin A. A Systematic Review and Meta-Analysis.
Source: Research Square preprint supplement (doi:10.21203/rs.3.rs-1424931/v1), 2022-03-22
Supplement: Supplementary file 1 [file 1ea822b29bc716c85872f704.docx]

**Supplementary Table 2- Primary and secondary keywords used in the search.**

| **Primary keywords** | **Secondary keywords** |
| --- | --- |
| “Gum” | “Botox” |
| “Gingiva” | “Botulinum toxin” |
| “Smile” | “BTX-A” |
| “Smiling” | “OnabotulinumtoxinA” |
| “Excessive gingival display” | “Dermal filler” |
| “Hyperfunction” | “AbobotulinumtoxinA” |
| “Hypermobility” | “Neumuscular blocking agent” |
| “Upper lip” |  |
| “Lip elevator” |  |
| “Vertical maxillary excess” |  |
